# Supplementary material for: Phylogenetic analyses of the mitochondrial, plastid, and nuclear genes of Babesia sp. Mymensingh and its naming as Babesia naoakii n. sp
Source: PubMed Central journal article supplement (PMC9404586; doi:10.1186/s13071-022-05374-9), 2022-08-24

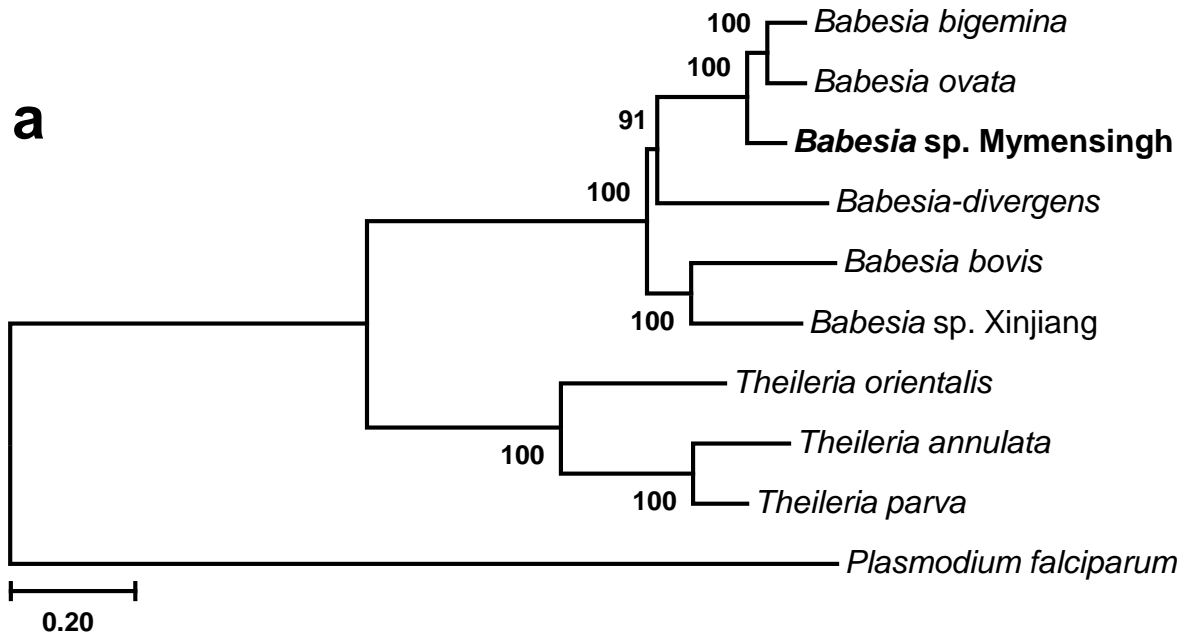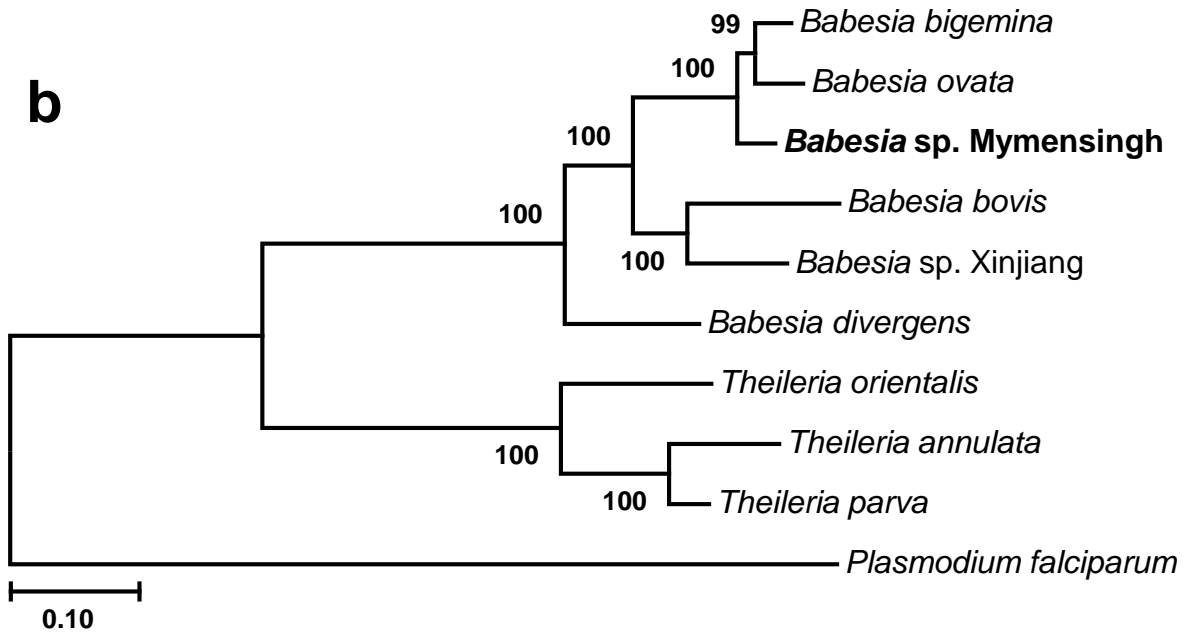

Supplement: 13071_2022_5374_MOESM3_ESM.pdf [file 13071_2022_5374_MOESM3_ESM.pdf]
